# Supplementary material
Source: publisher site journal article supplement (https://www.dovepress.com/article/348912)
Supplement: Supplementary file 1 [file get_supplementary_file.php]

## Supplementary material

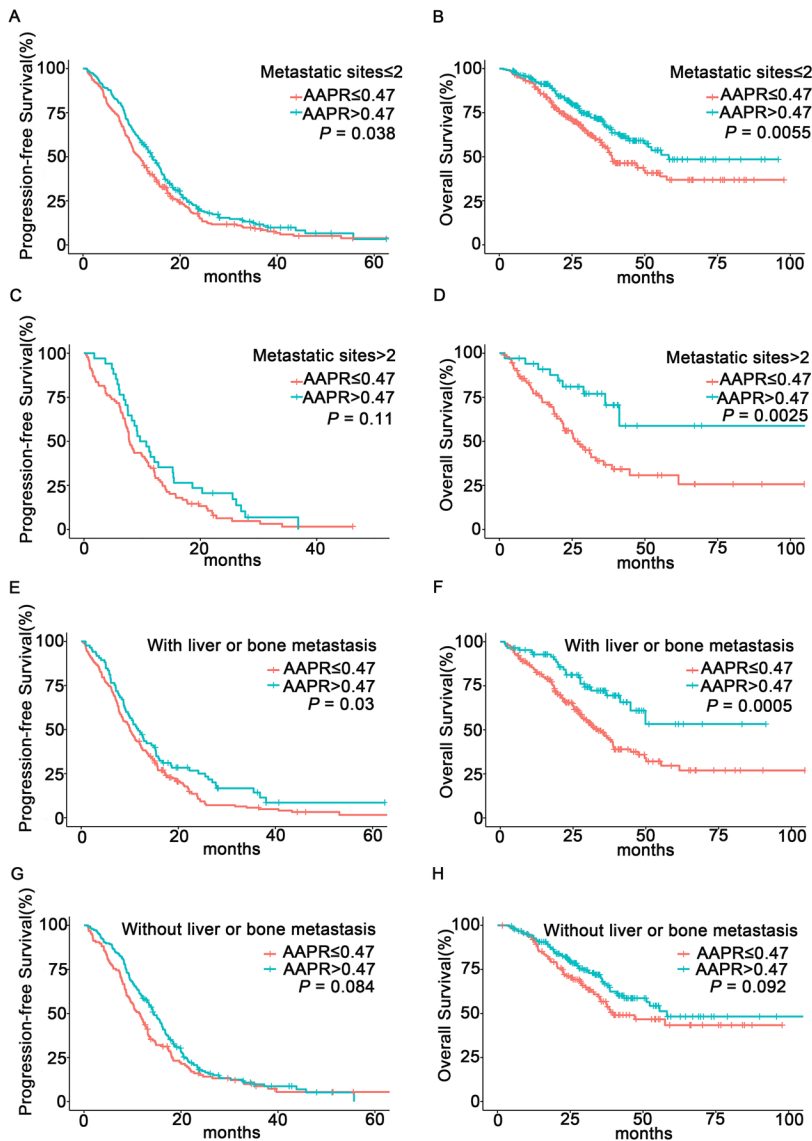

**Figure S1 Kaplan-Meier curves of progression-free survival (PFS) and overall survival (OS) according to AAPR level in different subgroups. (A, B)** PFS and OS in patients with two or fewer metastasis sites, **(C, D)** PFS and OS in patients with more than two metastasis sites, **(E, F)** PFS and OS in patients with liver/bone metastasis, **(G, H)** PFS and OS in patients without liver/bone metastasis.
